# Supplementary material for: Deprotonation of N3 adsorbed on TiO2 for high-performance dye-sensitized solar cells (DSSCs)
Source: Royal Society of Chemistry journal article supplement (doi:10.1039/c3ta12298k), 2013-01-01
Supplement: c3ta12298k.pdf [file c3ta12298k.pdf]

Electronic Supplementary Information (ESI) for Journal of Materials Chemistry A  
This journal is © Royal Society of Chemistry 2013

## Deprotonation of N3 Adsorbed on TiO<sub>2</sub> for High-Performance Dye-Sensitized Solar Cells (DSSCs)

Narayan Chandra Deb Nath,<sup>a</sup> Jae Cheon Kim,<sup>b</sup> Kwong Pyo Kim,<sup>c</sup> Sanggyu Yim,<sup>d\*</sup> and Jae-Joon  
Lee<sup>a,b\*</sup>

**Fig. S1** Fourier transform infrared spectra of (a) 0.3 mM N3 prior to and after chemical modification with 0.6 mM MPA in ethanol for 6 h (N3-MPA), (b) E(N3), E(N3-MPA, 0.1), and MPA, and (c) TiO<sub>2</sub> treated with 0.6 mM MPA in ethanol for 6 h.

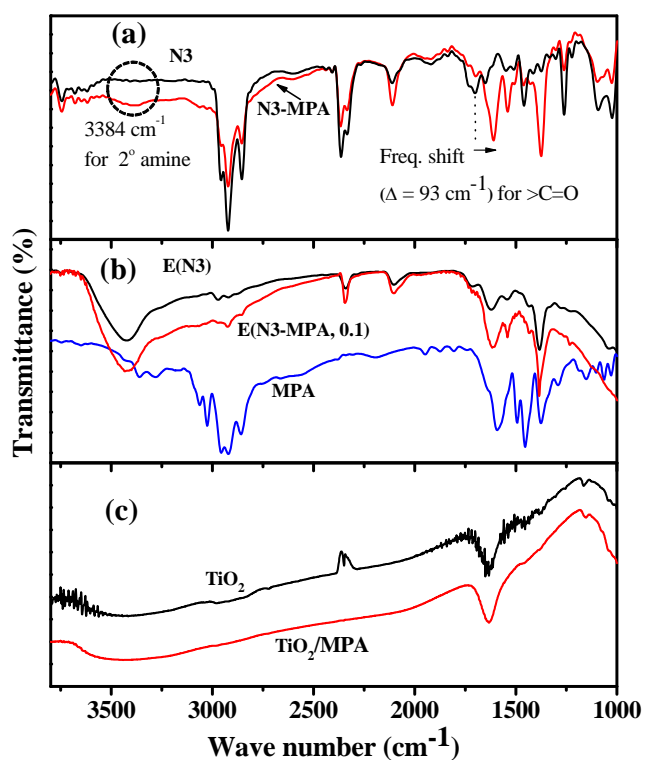

**Fig. S2**  $^1\text{H}$  NMR spectra of N3 and N3-MPA, using deuterated chloroform and tetramethylsilane as the solvent and internal reference, respectively.

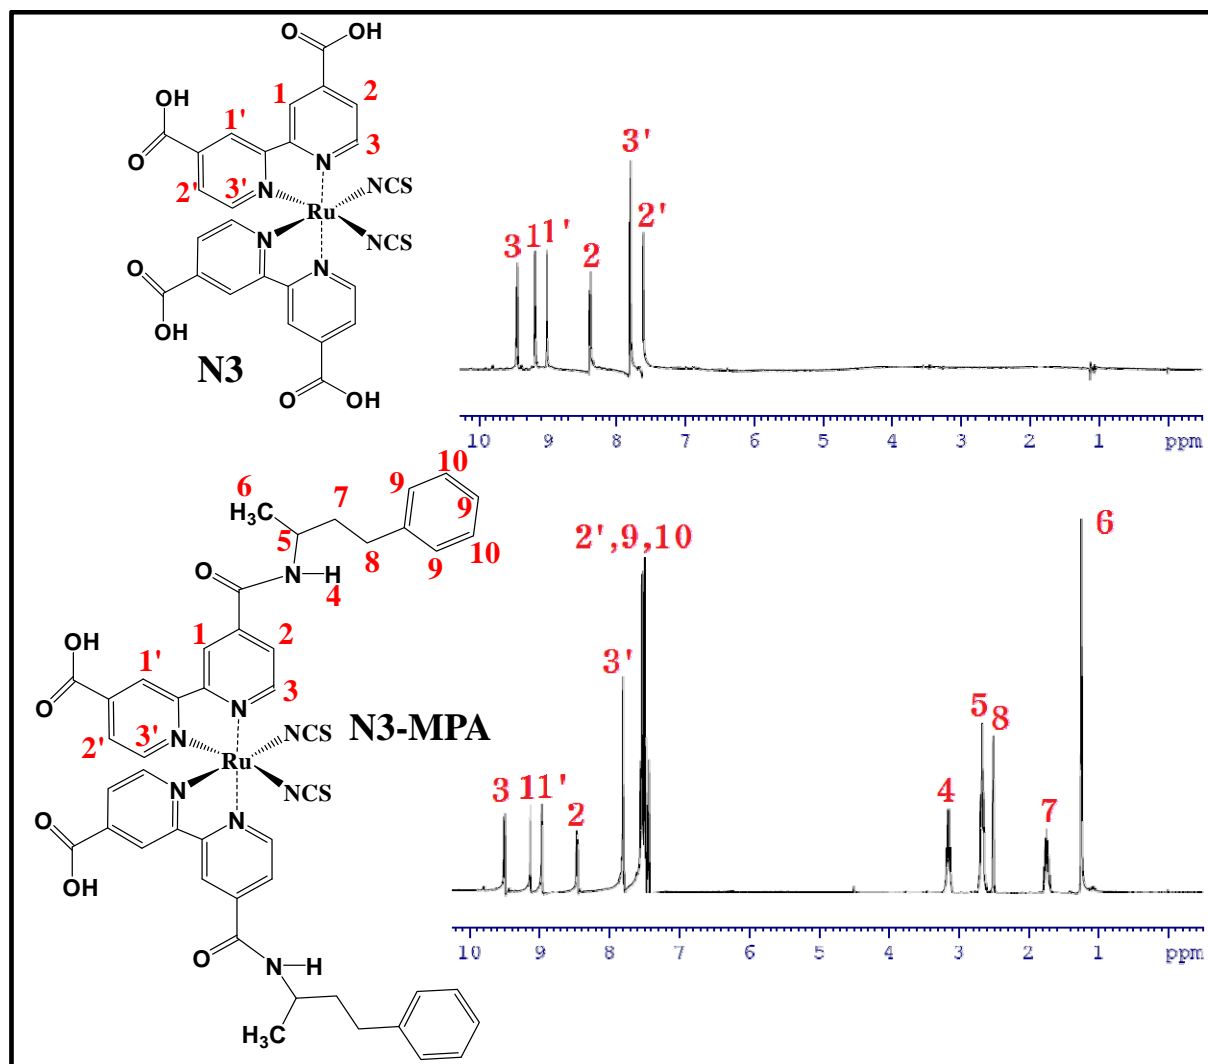

**Fig. S3** (a) Gold Matrix assisted laser desorption/ionization time-of-flight (MALDI-TOF) mass spectra of (a) N3 and (b) N3-MPA dissolved in anhydrous ethanol at positive mode. The calculated  $m/z$  of N3 ( $C_{26}H_{16}O_8N_6S_2Ru$ ) is about 705.00, which was found at 686.18 for (N3-NCS+K). The  $m/z$  response of N3-MPA adduct was found at 1209.11 for ([N3-MPA]-NCS+K), where the calculated  $m/z$  of N3-MPA ( $C_{66}H_{68}O_4N_{10}S_2Ru$ ) is about 1229.00. The spectrum also showed the response for N3 due to the presence of trace amount of unmodified N3 molecules.

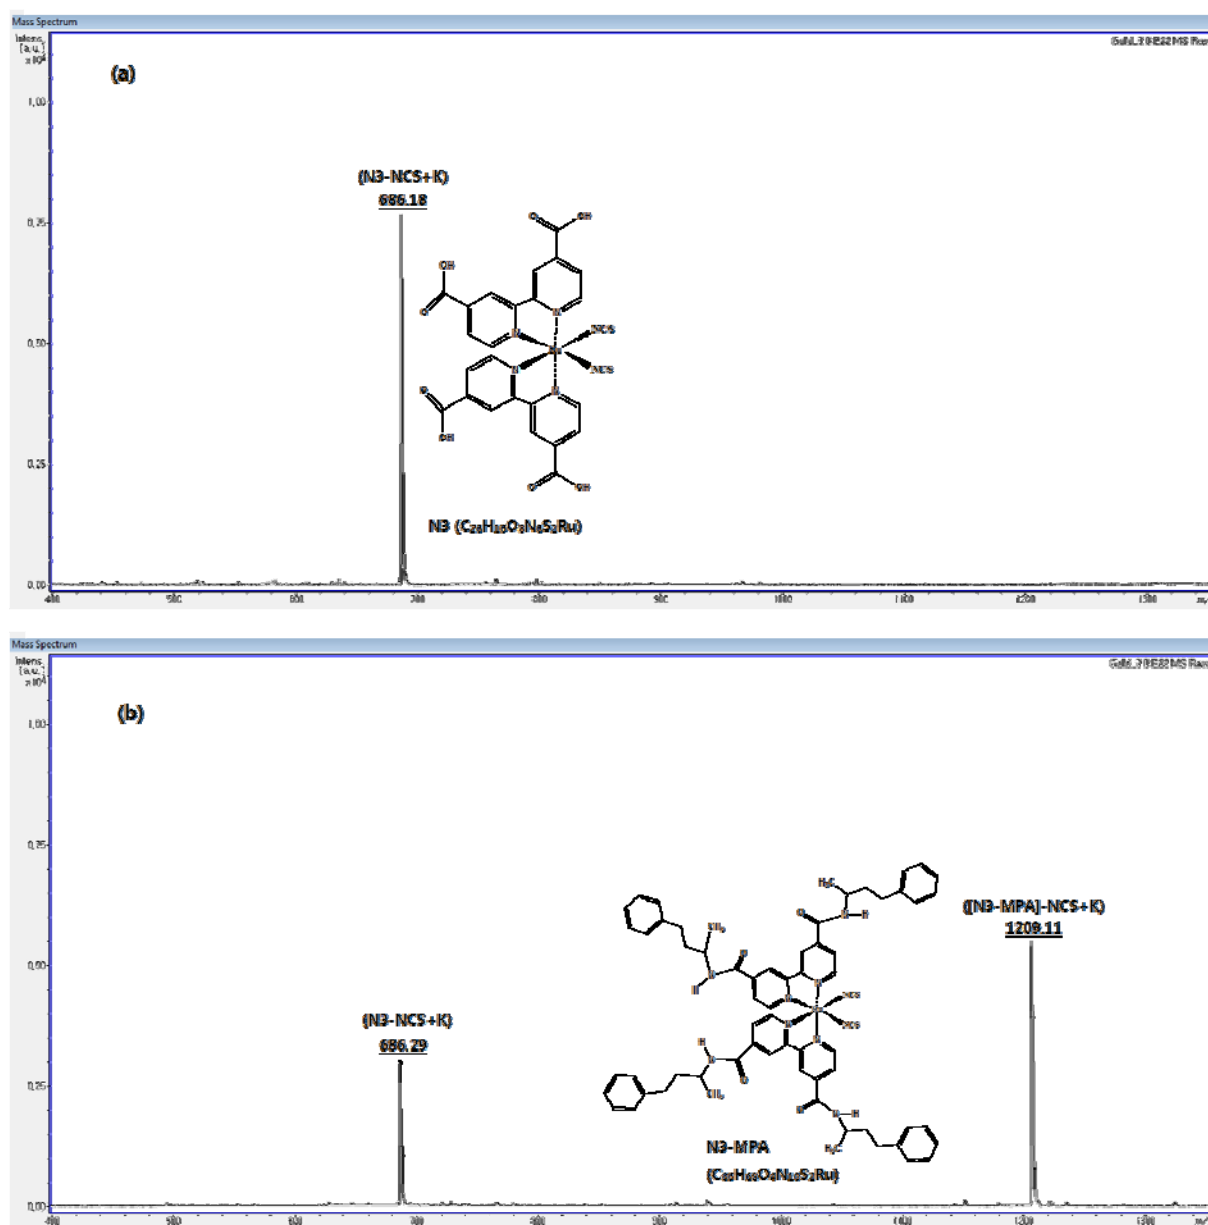

**Fig. S4** Cyclic voltammograms (CVs) of 0.3 mM N3 and N3-MPA in dimethylformamide containing 0.1 M tetrabutylammonium perchlorate, using a Pt disk as a working electrode at scan rate of 50 mV/s. The electrochemical redox behaviour of N3 is consistent with the previous report.<sup>S1</sup> The inset shows the UV-vis absorption spectra of 0.3 mM of N3 and N3-MPA in ethanol.

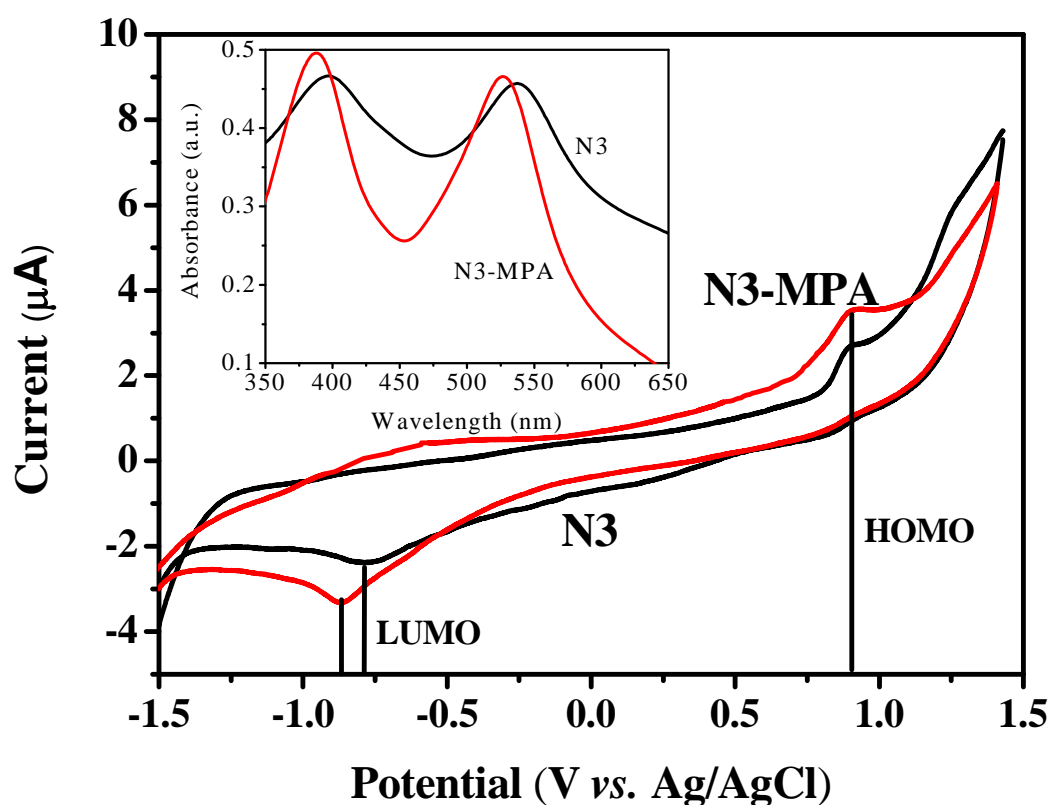

**Fig. S5** Photovoltaic parameters of DSSCs with photoelectrodes **E(N3)** and **E(N3-MPA, 0.1)** measured over 500 h.

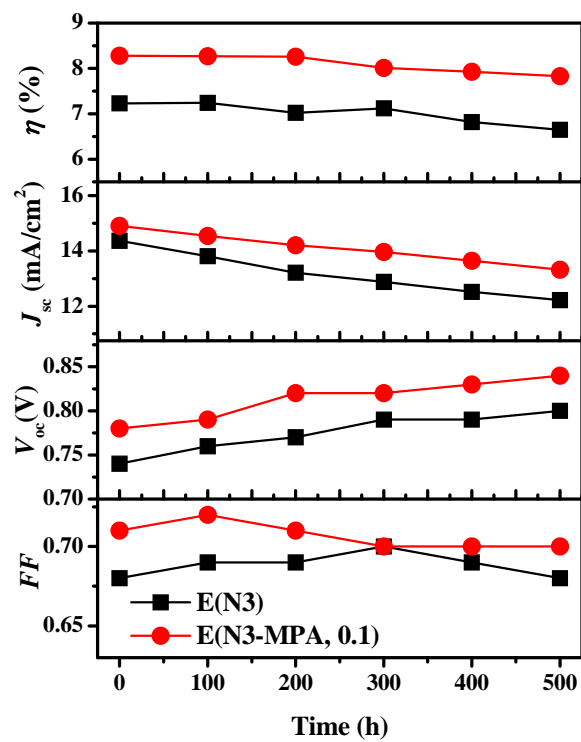

**Fig. S6** Photographic image of TiO<sub>2</sub> films sensitized with N3, (TiO<sub>2</sub>-N3) and after chemically modification with MPA, (TiO<sub>2</sub>-N3-MPA).

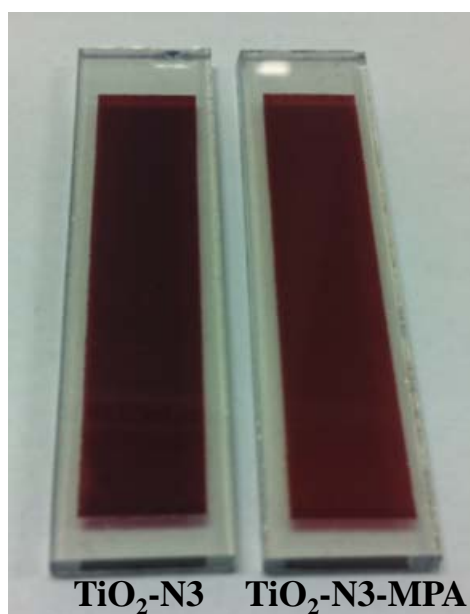

**Table S1** pH values without/with modification of N3 with MPA in ethanol.

| Solution | 0.3 mM N3 | 0.3 mM N3 + 0.05 mM MPA | 0.3 mM N3 + 0.1 mM MPA | 0.3 mM N3 + 0.3 mM MPA |
|----------|-----------|-------------------------|------------------------|------------------------|
| pH       | 6.42      | 7.32                    | 7.72                   | 9.10                   |

**Table S2** *J-V* performances of DSSCs sensitized chemically prepared N3-MPA. The *J-V* performances of the cells were very poor, which attributed to worse anchoring of N3-MPA on TiO<sub>2</sub> surface because of the deprotonation of all anchoring groups (-COOH) of N3 molecule with MPA.

| Dye    | $J_{sc}$ (mA/cm <sup>2</sup> ) | $V_{oc}$ (V) | $FF$ (%) | $\eta$ (%) | Dye-loading<br>$\times 10^4$ (mole/cm <sup>2</sup> ) |
|--------|--------------------------------|--------------|----------|------------|------------------------------------------------------|
| N3-MPA | 0.47                           | 4.55         | 65.67    | 1.4        | 0.091                                                |

## References

S1. R. Gao, L. Wang, B. Ma, C. Zhan, and Y. Qiu *Langmuir*, 2010, **26** (4), 2460.
